# Supplementary material
Source: publisher site journal article supplement (https://neobiota.pensoft.net/article/51150/download/suppl/31/)
Supplement: Supplementary file 1

## Supplementary material for:

### Application of the Socio-Economic Impact Classification for Alien Taxa (SEICAT) to a global assessment of alien bird impacts

Thomas Evans, Tim M. Blackburn, Jonathan M. Jeschke, Anna F. Probert, Sven Bacher

## Appendix A: Literature review protocol

### Search protocol

Following Evans et al. (2016), online searches were undertaken using the following search terms within a search string, in conjunction with the species scientific and common name: "introduced species", "invasive species", "invasive alien species", "IAS", "alien", "non-native", "non-indigenous", "invasive bird", "pest", "feral" and "exotic". Thus, the search string for the species Eurasian blackbird was ("introduced species" OR "invasive species" OR "invasive alien species" OR "IAS" OR "alien" OR "non-native" OR "non-indigenous" OR "invasive bird" OR "pest" OR "feral" OR "exotic") AND ("Eurasian blackbird" OR "blackbird" OR "Turdus merula").

### Data sources

#### Databases:

- Web of Science (<http://apps.webofknowledge.com/>)
- Google (<https://www.google.co.uk>)
- Google Scholar (<https://scholar.google.co.uk>)

#### Other online resources:

- IUCN Red List of Threatened Species (<http://www.iucnredlist.org>)
- Delivering Alien Invasive Species Inventories for Europe (DASIE) (<http://www.europe-alien.org>)
- CABI Invasive Species Compendium (<http://www.cabi.org/isc/>)
- Global Invasive Species Database (GISD) of the Invasive Species Specialist Group (ISSG) (<http://www.issg.org/database/welcome/>)

#### Key texts:

- Long (1981)
- Lever (2005)

### References

Evans T, Kumschick S, Blackburn TM (2016) Application of the Environmental Impact Classification for Alien Taxa (EICAT) to a global assessment of alien bird impacts. *Diversity and Distributions* 22: 919-931.

Lever C (2005) *Naturalised birds of the World*. T & AD Poyser (London).

Long JL (1981) *Introduced birds of the world. The worldwide history, distribution and influence of birds introduced to new environments*. David & Charles (London).
